# Supplementary material
Source: publisher site journal article supplement (https://www.dovepress.com/article/502400)

**Title: CircPRMT5, a potential salivary biomarker, facilitates the progression of head and neck squamous cell carcinoma via the IGF2BP3-SERPINE1 pathway**

**Supplementary Table S1:** shRNA/siRNA sequences.

| **Gene** | **Sequence (5’-3’)** |
| --- | --- |
| sh1-circPRMT5 | CAAGTTCTGGATGCGGGTA |
| sh2-circPRMT5 | TCCGGCTCCTCAAGTTCTG |
| sh-NC | TTCTCCGAACGTGTCACGT |
| si1-IGF2BP3 | GCACAUUUAAUUCCUGGAUUA |
| si2-IGF2BP3 | GCAGGAAUUGACGCUGUAU |
| si1-SERPINE1 | GCCACUGGAAAGGCAACAU |
| si2-SERPINE1 | CGAGUCUUUCAGACCAAGA |
| si-NC | UUCUCCGAACGUGUCACGU |

**Supplementary Table S2:** qRT-PCR primers.

| **Gene** | **Forward Primer** | **Reverse Primer** |
| --- | --- | --- |
| circPRMT5 | GGCTGACCTCCCATCTAATCA | ACCCGCATCCAGAACTTGAG |
| PRMT5 | TGTCATTGATCGCTGGCTTG | ATGAGCCTCTGGTGCATCTT |
| GAPDH | CTCCTCCTGTTCGACAGTCAGC | CCCAATACGACCAAATCCGTT |
| IGF2BP3 | CTTCCTGGTGAAGACTGGCT | TATCCAGCACCTCCCACTGTAA |
| SERPINE1 | CGCTGTCAAGAAGACCCACA | CTCAGAGGTGCCTTGCGATT |

**Supplementary Table S3:** Antibodies information**.**

| **Name** | **Item number** | **Company name** |
| --- | --- | --- |
| Mouse CD63 | 25682-1-AP | Proteintech |
| Mouse CD81 | 66866-1-Ig | Proteintech |
| Mouse TSG101 | 28283-1-AP | Proteintech |
| Mouse beta-Actin | T0022 | Affinity |
| Rabbit Ki67 | ab16667 | Abcam |
| Rabbit SERPINE1 | 13801-1-Ap | Proteintech |
| Rabbit IGF2BP3 | 14642-1-AP | Proteintech |
| Rabbit FMRP | 13755-1-AP | Proteintech |
| Rabbit pan-keratin | 26411-1-AP | Proteintech |
| CoraLite488-conjugated Goat Anti-Rabbit IgG(H+L) | SA00013-2 | Proteintech |
| HRP-conjugated Goat Anti-Rabbit IgG(H+L) | SA00001-2 | Proteintech |
| HRP-conjugated Goat Anti-Mouse IgG(H+L) | SA00001-1 | Proteintech |
| Goat Anti-Rabbit IgG H&L (HRP) | G1213 | Servicebio |
| Anti-Rabbit IgG HRP-linked Antibody | 7074S | Cell Signaling Technology |

**Supplementary Table S4:** RIP primers.

| **Gene** | **Forward Primer** | **Reverse Primer** |
| --- | --- | --- |
| circPRMT5 | TGTCATTGATCGCTGGCTTG | TACCCGCATCCAGAACTTGA |
| SERPINE1 | CGCTGTCAAGAAGACCCACA | CTCAGAGGTGCCTTGCGATT |

**Supplementary Figure S1: Impact of circPRMT5 on the overall physiological condition of tumor-bearing mice. A** Comparison of weight differences among subcutaneous tumor-bearing mice across various experimental groups. **B** Representative liver, kidney, and lung tissue images from mice with subcutaneous tumors. **C** Analysis of body weight changes in different groups of mice bearing orthotopic tumors. **D** Representative images of liver, kidney, and lung tissues from different groups of mice with orthotopic tumors. ***p*<0.01, ****p*<0.001

**Abbreviation**: ns, not significant.


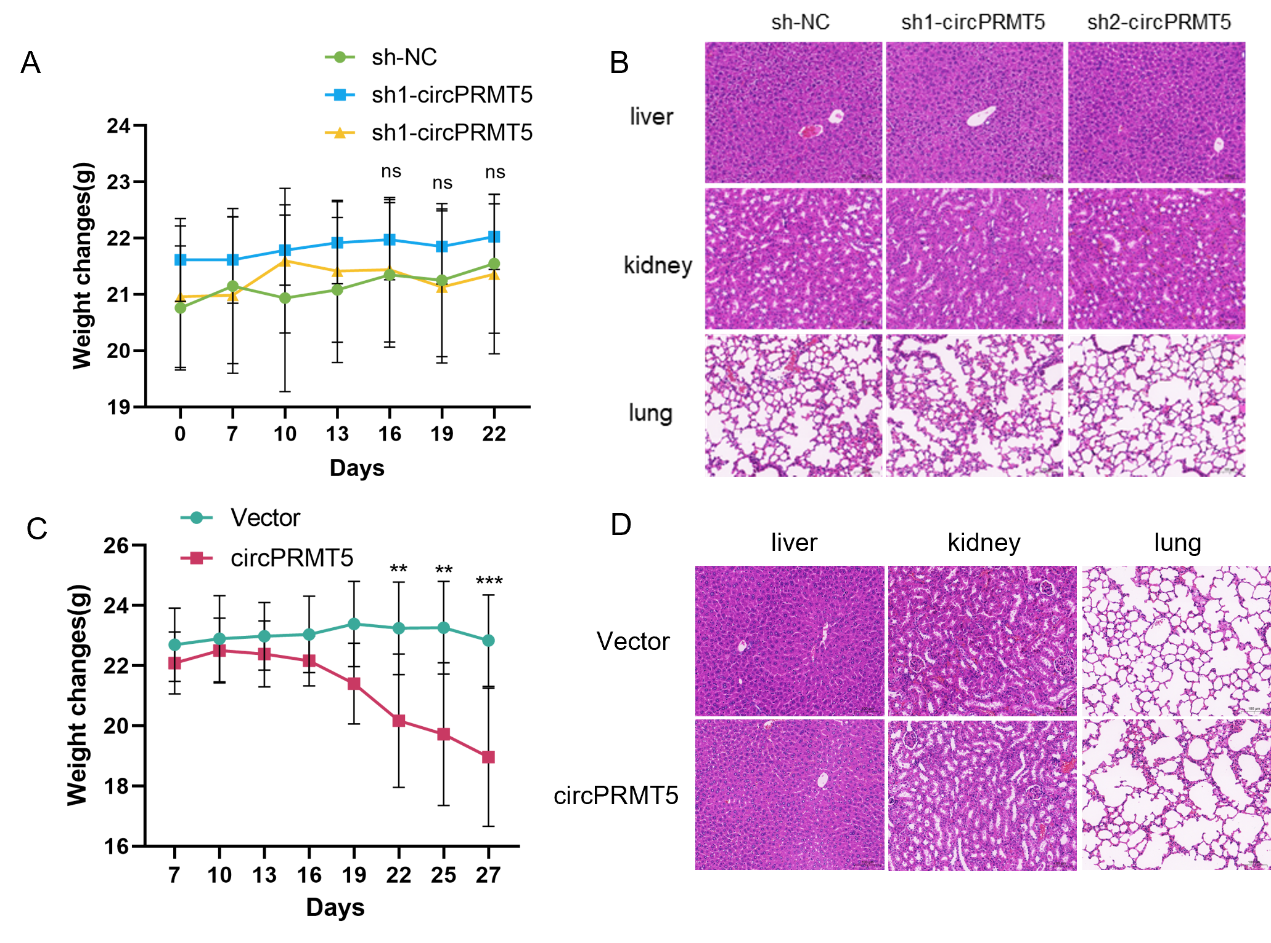


**Supplementary Figure S2: Screening of RNA binding proteins specifically bound to circPRMT5. A** Circintercome database predicts proteins binding directly to circPRMT5**. B** RIP was used to detect the binding efficiency of IGF2BP3 to circPRMT5 in HNSCC cells. ****p*<0.001, *****p*<0.0001.


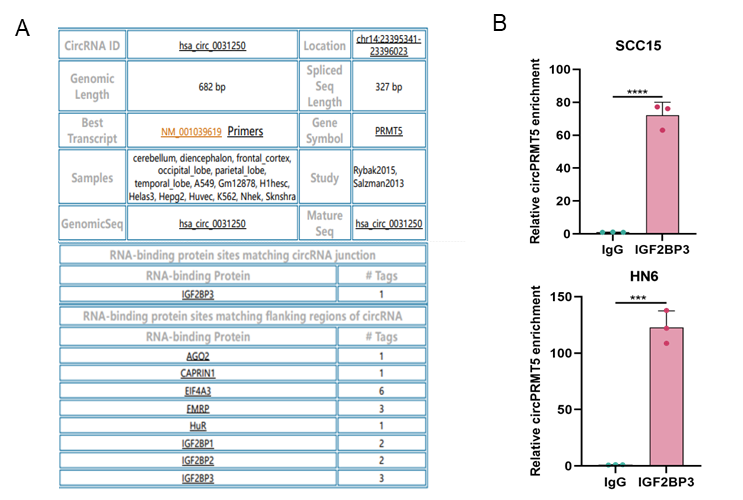


**Supplementary Figure S3: Silencing IGF2BP3 impedes the proliferation, migration, and invasion of HNSCC cells. A** The interference efficiency of IGF2BP3 siRNA, along with its impact on circPRMT5, was assessed using qRT-PCR. **B** The efficiency of IGF2BP3 interference at the protein level in HNSCC cells was evaluated. **C** The proliferation capacity of HNSCC cells was measured using the CCK8 assay. **D** Representative images and statistical analyses of HNSCC cell migration were obtained through a wound-healing assay. **E** Representative images and statistical analyses of HNSCC cell invasion and migration were conducted using the transwell assay. **p*<0.05, ***p*<0.01, ****p*<0.001, *****p*<0.0001.

**Abbreviation**: ns, not significant.


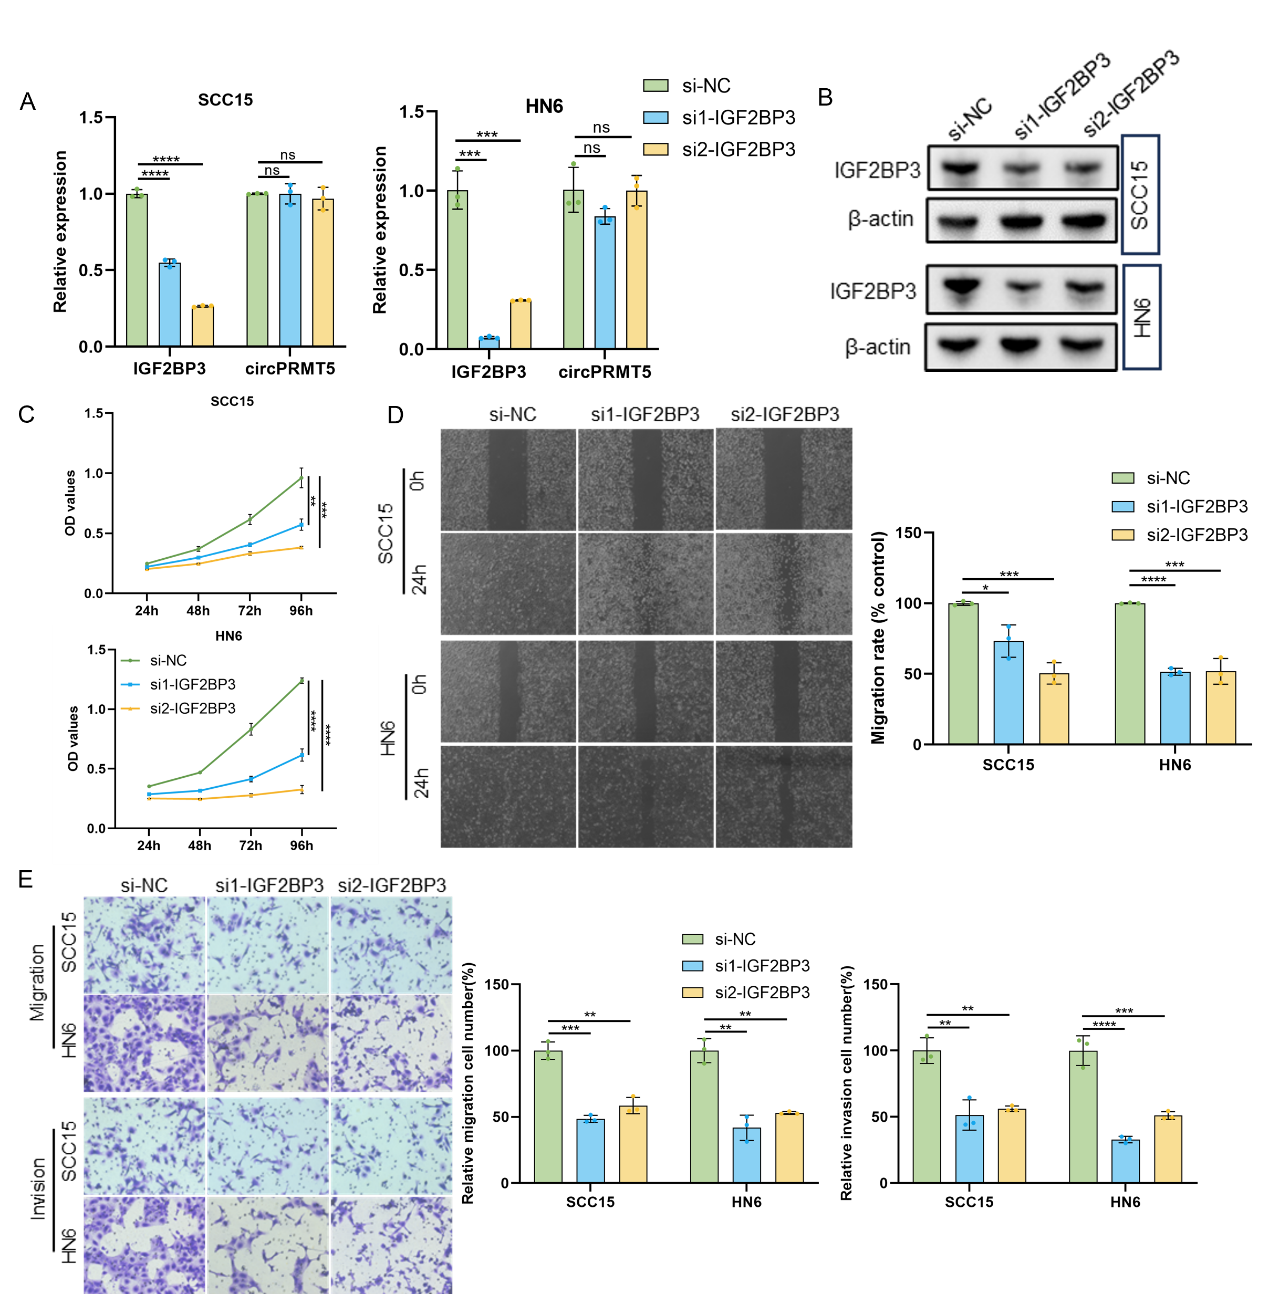


**Supplementary Figure S4: The suppression of SERPINE1 expression impedes the proliferation, migration, and invasion of HNSCC cells. A** The interference efficiency of SERPINE1 siRNA and its impact on IGF2BP3 and circPRMT5 was assessed using qRT-PCR. **B** The efficiency of SERPINE1 interference at the protein level in HNSCC cells was evaluated. **C** The proliferative capacity of HNSCC cells was measured using the CCK8 assay. **D** Representative images and statistical analyses of HNSCC cell migration ability were obtained through a wound-healing assay. **E** Representative images and statistical analyses of HNSCC cell invasion and migration abilities were determined using the transwell assay. ***p*<0.01, ****p*<0.001, *****p*<0.0001.

**Abbreviation**: ns, not significant.


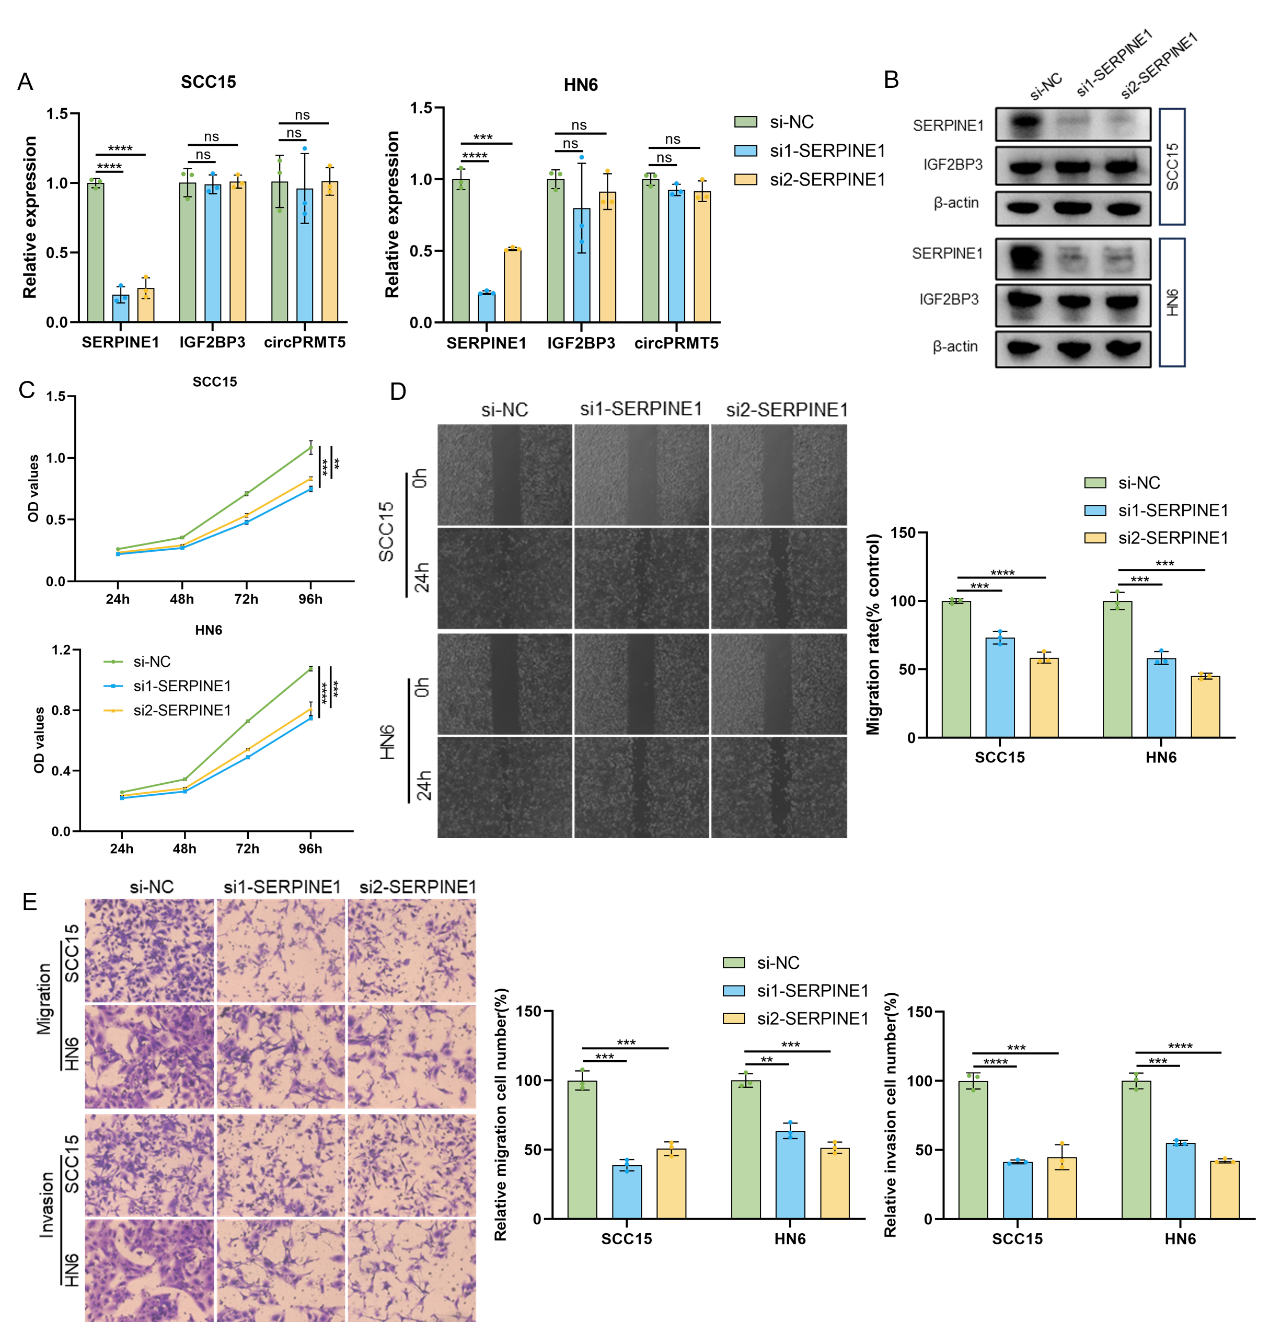

Supplement: Supplementary file 1 [file get_supplementary_file.php]
